# Supplementary material
Source: PubMed Central journal article supplement (PMC2685957)
Supplement: supp_136_4_677__1.pdf [file supp_136_4_677__1.pdf]

**Table S1. Data for Fig. 1E**

| Stages |          | E0    | E90  | E180 | Einf | Esp  | Viscosity |
|--------|----------|-------|------|------|------|------|-----------|
| 11.5   | Mean     | 39.4  | 15.4 | 12.9 | 14.1 | 19.2 | 4.5E+002  |
|        | <i>n</i> | 8     | 8    | 8    | 8    | 8    | 8         |
|        | s.d.     | 20.3  | 4.4  | 4.4  | 4.7  | 17.2 | 5.7E+002  |
| 13.0   | Mean     | 56.4  | 18.1 | 14.1 | 15.1 | 30.0 | 9.9E+002  |
|        | <i>n</i> | 14    | 14   | 14   | 14   | 14   | 14        |
|        | s.d.     | 23.7  | 5.1  | 5.0  | 4.9  | 20.6 | 7.0E+002  |
| 15.0   | Mean     | 63.7  | 32.5 | 28.4 | 29.3 | 22.2 | 8.2E+002  |
|        | <i>n</i> | 20    | 20   | 20   | 20   | 20   | 20        |
|        | s.d.     | 14.1  | 5.6  | 5.2  | 6.1  | 7.0  | 6.7E+002  |
| 19.0   | Mean     | 132.4 | 60.6 | 51.2 | 53.2 | 50.1 | 2.0E+003  |
|        | <i>n</i> | 10    | 10   | 10   | 10   | 10   | 10        |
|        | s.d.     | 35.0  | 11.1 | 7.1  | 8.8  | 18.7 | 1.7E+003  |
| 21.0   | Mean     | 223.3 | 95.3 | 81.1 | 86.7 | 82.9 | 2.4E+003  |
|        | <i>n</i> | 12    | 12   | 12   | 12   | 12   | 12        |
|        | s.d.     | 120.9 | 13.9 | 11.7 | 15.2 | 71.7 | 1.1E+003  |
