# Supplementary material
Source: PubMed Central journal article supplement (PMC2685957)
Supplement: supp_136_4_677__2.pdf [file supp_136_4_677__2.pdf]

**Table S2. Data for Fig. 2D**

| Run | Treatment    |          | E0    | E90  | E180 | Einf | Esp  | Viscosity |
|-----|--------------|----------|-------|------|------|------|------|-----------|
| 1   | 0 Notochord  | Mean     | 78.7  | 43.0 | 36.4 | 33.8 | 28.0 | 2.6E+003  |
|     |              | <i>n</i> | 7     | 7    | 7    | 7    | 7    | 7         |
|     |              | s.d.     | 16.0  | 11.3 | 9.0  | 7.2  | 9.2  | 3.0E+003  |
|     | 2+ Notochord | Mean     | 136.7 | 90.7 | 86.7 | 81.5 | 46.5 | 2.9E+003  |
|     |              | <i>n</i> | 7     | 7    | 7    | 7    | 7    | 7         |
|     |              | s.d.     | 43.4  | 27.3 | 25.1 | 22.5 | 19.1 | 4.4E+003  |
| 2   | 0 Notochord  | Mean     | 88.5  | 40.4 | 35.4 | 36.3 | 33.9 | 1.2E+003  |
|     |              | <i>n</i> | 8     | 8    | 8    | 8    | 8    | 8         |
|     |              | s.d.     | 10.9  | 9.0  | 9.0  | 10.7 | 4.7  | 7.2E+002  |
|     | 2+ Notochord | Mean     | 151.9 | 75.3 | 66.5 | 67.1 | 51.0 | 2.2E+003  |
|     |              | <i>n</i> | 8     | 8    | 8    | 8    | 8    | 8         |
|     |              | s.d.     | 16.4  | 8.4  | 8.3  | 9.0  | 7.9  | 9.3E+002  |
| 3   | 0 Notochord  | Mean     | 92.3  | 45.9 | 41.3 | 41.4 | 31.0 | 1.2E+003  |
|     |              | <i>n</i> | 8     | 8    | 8    | 8    | 8    | 8         |
|     |              | s.d.     | 17.9  | 8.5  | 8.3  | 8.3  | 8.1  | 7.9E+002  |
|     | 2+ Notochord | Mean     | 141.4 | 75.4 | 61.7 | 57.2 | 57.0 | 4.5E+003  |
|     |              | <i>n</i> | 8     | 8    | 8    | 8    | 8    | 8         |
|     |              | s.d.     | 15.6  | 8.9  | 8.4  | 11.1 | 15.1 | 4.0E+003  |
