# Supplementary material
Source: PubMed Central journal article supplement (PMC2685957)
Supplement: supp_136_4_677__3.pdf [file supp_136_4_677__3.pdf]

**Table S3. Data for Fig. 2D'**

| Run | Treatment   |          | E0    | E90  | E180 | Einf | Esp  | Viscosity |
|-----|-------------|----------|-------|------|------|------|------|-----------|
| 1   | 0 Notochord | Mean     | 91.1  | 40.6 | 32.0 | 27.8 | 40.2 | 3.3E+003  |
|     |             | <i>n</i> | 8     | 8    | 8    | 8    | 8    | 8         |
|     |             | s.d.     | 19.1  | 9.2  | 7.5  | 9.1  | 11.6 | 2.7E+003  |
|     | 2 Notochord | Mean     | 115.5 | 50.0 | 39.7 | 40.3 | 48.3 | 2.5E+003  |
|     |             | <i>n</i> | 8     | 8    | 8    | 8    | 8    | 8         |
|     |             | s.d.     | 13.3  | 8.1  | 8.4  | 9.0  | 5.7  | 5.3E+002  |
| 2   | 0 Notochord | Mean     | 133.1 | 74.9 | 57.8 | 46.4 | 57.1 | 7.2E+003  |
|     |             | <i>n</i> | 8     | 8    | 8    | 8    | 8    | 8         |
|     |             | s.d.     | 25.7  | 19.3 | 19.8 | 26.8 | 18.5 | 5.5E+003  |
|     | 2 Notochord | Mean     | 125.9 | 67.3 | 56.2 | 52.5 | 58.0 | 4.0E+003  |
|     |             | <i>n</i> | 8     | 8    | 8    | 8    | 8    | 8         |
|     |             | s.d.     | 17.4  | 14.2 | 17.8 | 18.8 | 26.4 | 3.6E+003  |
| 3   | 0 Notochord | Mean     | 138.8 | 56.9 | 36.9 | 26.6 | 86.3 | 7.7E+003  |
|     |             | <i>n</i> | 8     | 8    | 8    | 8    | 8    | 8         |
|     |             | s.d.     | 20.7  | 11.4 | 6.9  | 12.9 | 26.1 | 5.3E+003  |
|     | 2 Notochord | Mean     | 121.6 | 53.5 | 38.3 | 34.9 | 73.9 | 4.7E+003  |
|     |             | <i>n</i> | 7     | 7    | 7    | 7    | 7    | 7         |
|     |             | s.d.     | 11.3  | 8.5  | 9.2  | 10.0 | 10.2 | 1.6E+003  |
