# Supplementary material
Source: PubMed Central journal article supplement (PMC2685957)
Supplement: supp_136_4_677__4.pdf [file supp_136_4_677__4.pdf]

**Table S4. Data for Fig. 21**

| Run | Treatment    |          | E0    | E90   | E180  | Einf  | Esp  | Viscosity |
|-----|--------------|----------|-------|-------|-------|-------|------|-----------|
| 1   | LiCl treated | Mean     | 139.7 | 76.7  | 63.1  | 53.7  | 59.5 | 6.2E+003  |
|     |              | <i>n</i> | 8     | 8     | 8     | 8     | 8    | 8         |
|     |              | s.d.     | 36.2  | 18.5  | 15.3  | 19.0  | 19.1 | 4.7E+003  |
|     | Control      | Mean     | 143.5 | 61.8  | 43.4  | 31.3  | 82.2 | 8.3E+003  |
|     |              | <i>n</i> | 8     | 8     | 8     | 8     | 8    | 8         |
|     |              | s.d.     | 23.8  | 8.1   | 5.7   | 19.7  | 15.1 | 5.8E+003  |
| 2   | LiCl treated | Mean     | 212.4 | 154.8 | 134.5 | 109.8 | 77.6 | 1.3E+004  |
|     |              | <i>n</i> | 8     | 8     | 8     | 8     | 8    | 8         |
|     |              | s.d.     | 25.7  | 23.8  | 22.4  | 29.2  | 17.2 | 6.3E+003  |
|     | Control      | Mean     | 194.0 | 146.2 | 134.2 | 127.2 | 52.0 | 4.7E+003  |
|     |              | <i>n</i> | 8     | 8     | 8     | 8     | 8    | 8         |
|     |              | s.d.     | 18.0  | 11.8  | 17.2  | 19.7  | 20.8 | 3.2E+003  |
| 3   | LiCl treated | Mean     | 112.7 | 55.5  | 43.4  | 35.4  | 50.7 | 5.5E+003  |
|     |              | <i>n</i> | 8     | 8     | 8     | 8     | 8    | 8         |
|     |              | s.d.     | 36.4  | 30.1  | 19.8  | 11.7  | 26.1 | 6.5E+003  |
|     | Control      | Mean     | 137.0 | 64.9  | 44.8  | 32.8  | 70.7 | 8.6E+003  |
|     |              | <i>n</i> | 7     | 7     | 7     | 7     | 7    | 7         |
|     |              | s.d.     | 27.7  | 13.9  | 9.7   | 24.5  | 39.4 | 1.0E+004  |
| 4   | LiCl treated | Mean     | 102.5 | 51.0  | 45.2  | 45.0  | 36.8 | 1.7E+003  |
|     |              | <i>n</i> | 6     | 6     | 6     | 6     | 6    | 6         |
|     |              | s.d.     | 12.0  | 7.5   | 6.6   | 8.5   | 6.1  | 1.3E+003  |
|     | Control      | Mean     | 94.3  | 50.5  | 41.8  | 40.8  | 32.1 | 2.0E+003  |
|     |              | <i>n</i> | 7     | 7     | 7     | 7     | 7    | 7         |
|     |              | s.d.     | 16.3  | 14.5  | 12.2  | 13.0  | 9.9  | 7.1E+002  |
| 5   | LiCl treated | Mean     | 150.9 | 100.5 | 90.3  | 81.4  | 45.7 | 5.4E+003  |
|     |              | <i>n</i> | 9     | 9     | 9     | 9     | 9    | 9         |
|     |              | s.d.     | 6.6   | 10.6  | 14.1  | 21.1  | 14.3 | 4.3E+003  |
|     | Control      | Mean     | 169.2 | 96.8  | 81.6  | 74.1  | 64.5 | 5.9E+003  |
|     |              | <i>n</i> | 8     | 8     | 8     | 8     | 8    | 8         |
|     |              | s.d.     | 12.4  | 14.6  | 14.2  | 13.1  | 17.0 | 3.4E+003  |
