# Supplementary material
Source: PubMed Central journal article supplement (PMC2685957)
Supplement: supp_136_4_677__5.pdf [file supp_136_4_677__5.pdf]

**Table S5. Data for Fig. 3E**

| Run | Treatment |          | E0    | E90  | E180 | Einf | Esp   | Viscosity |
|-----|-----------|----------|-------|------|------|------|-------|-----------|
| 1   | LL        | Mean     | 103.5 | 42.5 | 38.1 | 39.3 | 44.1  | 1.5E+003  |
|     |           | <i>n</i> | 6     | 6    | 6    | 6    | 6     | 6         |
|     |           | s.d.     | 9.9   | 7.2  | 6.1  | 7.2  | 4.7   | 6.0E+002  |
|     | MM        | Mean     | 140.9 | 74.5 | 60.3 | 50.5 | 64.9  | 6.5E+003  |
|     |           | <i>n</i> | 7     | 7    | 7    | 7    | 7     | 7         |
|     |           | s.d.     | 20.4  | 22.6 | 15.6 | 15.2 | 17.8  | 6.1E+003  |
| 2   | LL        | Mean     | 108.4 | 53.8 | 43.7 | 39.4 | 45.5  | 4.0E+003  |
|     |           | <i>n</i> | 8     | 8    | 8    | 8    | 8     | 8         |
|     |           | s.d.     | 14.7  | 9.1  | 7.2  | 15.5 | 18.5  | 5.7E+003  |
|     | MM        | Mean     | 152.2 | 90.0 | 77.9 | 69.0 | 56.7  | 5.6E+003  |
|     |           | <i>n</i> | 9     | 9    | 9    | 9    | 9     | 9         |
|     |           | s.d.     | 13.4  | 12.4 | 12.2 | 19.2 | 17.2  | 5.1E+003  |
| 3   | LL        | Mean     | 118.3 | 57.4 | 40.2 | 26.8 | 70.9  | 8.1E+003  |
|     |           | <i>n</i> | 8     | 8    | 8    | 8    | 8     | 8         |
|     |           | s.d.     | 22.8  | 11.3 | 8.8  | 20.9 | 29.4  | 7.5E+003  |
|     | MM        | Mean     | 168.0 | 76.4 | 52.1 | 35.7 | 106.9 | 1.1E+004  |
|     |           | <i>n</i> | 8     | 8    | 8    | 8    | 8     | 8         |
|     |           | s.d.     | 15.9  | 7.8  | 7.7  | 20.0 | 15.8  | 6.4E+003  |
