# Supplementary material
Source: PubMed Central journal article supplement (PMC2685957)
Supplement: supp_136_4_677__6.pdf [file supp_136_4_677__6.pdf]

**Table S6. Data for Fig. 4B**

| Run | Treatment            |          | E0    | E90   | E180 | Einf | Esp  | Viscosity |
|-----|----------------------|----------|-------|-------|------|------|------|-----------|
| 1   | Without neural plate | Mean     | 104.4 | 44.1  | 33.0 | 31.7 | 52.2 | 3.2E+003  |
|     |                      | <i>n</i> | 9     | 9     | 9    | 9    | 9    | 9         |
|     |                      | s.d.     | 25.9  | 11.8  | 10.6 | 11.4 | 17.7 | 1.4E+003  |
|     | Control              | Mean     | 163.5 | 65.1  | 39.8 | 32.0 | 99.0 | 7.9E+003  |
|     |                      | <i>n</i> | 9     | 9     | 9    | 9    | 9    | 9         |
|     |                      | s.d.     | 34.6  | 13.6  | 7.9  | 6.6  | 24.0 | 2.5E+003  |
| 2   | Without neural plate | Mean     | 183.1 | 102.6 | 94.1 | 93.7 | 56.4 | 2.6E+003  |
|     |                      | <i>n</i> | 7     | 7     | 7    | 7    | 7    | 7         |
|     |                      | s.d.     | 28.4  | 18.9  | 18.9 | 19.8 | 19.4 | 8.6E+002  |
|     | Control              | Mean     | 127.1 | 64.2  | 52.6 | 51.2 | 52.3 | 3.2E+003  |
|     |                      | <i>n</i> | 8     | 8     | 8    | 8    | 8    | 8         |
|     |                      | s.d.     | 27.1  | 13.7  | 10.8 | 10.5 | 15.8 | 1.5E+003  |
| 3   | Without neural plate | Mean     | 111.4 | 54.4  | 49.4 | 48.8 | 40.1 | 1.8E+003  |
|     |                      | <i>n</i> | 9     | 9     | 9    | 9    | 9    | 9         |
|     |                      | s.d.     | 22.2  | 12.1  | 10.1 | 10.1 | 10.1 | 1.1E+003  |
|     | Control              | Mean     | 119.6 | 58.8  | 47.5 | 46.3 | 51.8 | 3.1E+003  |
|     |                      | <i>n</i> | 9     | 9     | 9    | 9    | 9    | 9         |
|     |                      | s.d.     | 22.1  | 19.1  | 15.5 | 16.5 | 13.3 | 2.6E+003  |
| 4   | Without neural plate | Mean     | 94.2  | 57.7  | 53.6 | 48.5 | 33.7 | 2.9E+003  |
|     |                      | <i>n</i> | 9     | 9     | 9    | 9    | 9    | 9         |
|     |                      | s.d.     | 35.4  | 23.2  | 19.3 | 18.6 | 27.0 | 6.8E+003  |
|     | Control              | Mean     | 117.7 | 50.0  | 36.9 | 32.7 | 63.1 | 4.3E+003  |
|     |                      | <i>n</i> | 8     | 8     | 8    | 8    | 8    | 8         |
|     |                      | s.d.     | 19.7  | 12.7  | 10.1 | 9.9  | 12.6 | 2.4E+003  |
| 5   | Without neural plate | Mean     | 118.2 | 69.3  | 62.0 | 59.8 | 37.4 | 2.5E+003  |
|     |                      | <i>n</i> | 7     | 7     | 7    | 7    | 7    | 7         |
|     |                      | s.d.     | 20.6  | 15.8  | 14.8 | 14.5 | 11.6 | 1.8E+003  |
|     | Control              | Mean     | 113.5 | 55.1  | 44.5 | 42.4 | 52.3 | 3.2E+003  |
|     |                      | <i>n</i> | 8     | 8     | 8    | 8    | 8    | 8         |
|     |                      | s.d.     | 13.5  | 8.0   | 6.8  | 7.2  | 11.9 | 1.1E+003  |
