# Supplementary material
Source: PubMed Central journal article supplement (PMC2685957)
Supplement: supp_136_4_677__7.pdf [file supp_136_4_677__7.pdf]

**Table S7. Data for Fig. 4C**

| Run | Treatment        |          | E0    | E90   | E180  | Einf  | Esp  | Viscosity |
|-----|------------------|----------|-------|-------|-------|-------|------|-----------|
| 1   | Without endoderm | Mean     | 107.3 | 50.6  | 41.1  | 37.6  | 50.1 | 3.4E+003  |
|     |                  | <i>n</i> | 8     | 8     | 8     | 8     | 8    | 8         |
|     |                  | s.d.     | 11.8  | 7.7   | 8.1   | 12.5  | 15.6 | 2.7E+003  |
|     | Control          | Mean     | 103.3 | 41.7  | 31.3  | 29.7  | 56.1 | 3.1E+003  |
|     |                  | <i>n</i> | 8     | 8     | 8     | 8     | 8    | 8         |
|     |                  | s.d.     | 12.0  | 8.9   | 7.7   | 7.9   | 9.1  | 1.0E+003  |
| 2   | Without endoderm | Mean     | 128.1 | 71.1  | 62.9  | 62.0  | 44.6 | 2.5E+003  |
|     |                  | <i>n</i> | 9     | 9     | 9     | 9     | 9    | 9         |
|     |                  | s.d.     | 17.4  | 10.2  | 8.8   | 9.6   | 9.2  | 1.3E+003  |
|     | Control          | Mean     | 109.9 | 55.3  | 49.9  | 49.8  | 39.9 | 1.7E+003  |
|     |                  | <i>n</i> | 9     | 9     | 9     | 9     | 9    | 9         |
|     |                  | s.d.     | 19.2  | 8.2   | 7.1   | 8.0   | 11.3 | 1.1E+003  |
| 3   | Without endoderm | Mean     | 168.0 | 106.7 | 103.4 | 101.8 | 46.7 | 1.7E+003  |
|     |                  | <i>n</i> | 8     | 8     | 8     | 8     | 8    | 8         |
|     |                  | s.d.     | 17.4  | 11.3  | 17.6  | 16.6  | 11.6 | 1.4E+003  |
|     | Control          | Mean     | 131.6 | 67.5  | 60.6  | 58.7  | 49.7 | 2.5E+003  |
|     |                  | <i>n</i> | 8     | 8     | 8     | 8     | 8    | 8         |
|     |                  | s.d.     | 16.4  | 12.8  | 11.8  | 11.3  | 15.4 | 1.8E+003  |
