# Supplementary material
Source: PubMed Central journal article supplement (PMC2685957)
Supplement: supp_136_4_677__8.pdf [file supp_136_4_677__8.pdf]

**Table S8. Data for Fig. 5B**

| Stage    | Run     | Treatment |          | E0    | E90  | E180 | Einf | Esp      | Viscosity |
|----------|---------|-----------|----------|-------|------|------|------|----------|-----------|
| Stage 13 | 1       | Control   | Mean     | 88.2  | 46.9 | 40.9 | 38.9 | 30.5     | 2.1E+003  |
|          |         |           | <i>n</i> | 9     | 9    | 9    | 9    | 9        | 9         |
|          |         |           | s.d.     | 9.7   | 7.7  | 8.5  | 11.3 | 9.5      | 2.1E+003  |
|          |         | FNMO      | Mean     | 70.7  | 40.4 | 35.7 | 33.7 | 22.0     | 1.8E+003  |
|          |         |           | <i>n</i> | 9     | 9    | 9    | 9    | 9        | 9         |
|          |         |           | s.d.     | 12.6  | 7.1  | 8.0  | 10.4 | 4.8      | 1.8E+003  |
|          | 2       | Control   | Mean     | 104.3 | 47.3 | 39.6 | 39.5 | 45.8     | 2.2E+003  |
|          |         |           | <i>n</i> | 9     | 9    | 9    | 9    | 9        | 9         |
|          |         |           | s.d.     | 16.2  | 5.9  | 5.3  | 5.2  | 13.4     | 4.3E+002  |
|          |         | FNMO      | Mean     | 89.9  | 41.4 | 35.8 | 35.2 | 38.4     | 1.9E+003  |
|          |         |           | <i>n</i> | 9     | 9    | 9    | 9    | 9        | 9         |
|          |         |           | s.d.     | 17.4  | 8.9  | 7.4  | 8.1  | 10.1     | 7.4E+002  |
| 3        | Control | Mean      | 103.9    | 43.6  | 38.3 | 37.6 | 53.2 | 2.2E+003 |           |
|          |         | <i>n</i>  | 7        | 7     | 7    | 7    | 7    | 7        |           |
|          |         | s.d.      | 20.1     | 9.2   | 6.4  | 5.8  | 13.1 | 1.0E+003 |           |
|          | FNMO    | Mean      | 102.8    | 45.7  | 38.9 | 37.0 | 48.7 | 2.5E+003 |           |
|          |         | <i>n</i>  | 8        | 8     | 8    | 8    | 8    | 8        |           |
|          |         | s.d.      | 12.9     | 7.9   | 6.3  | 4.3  | 13.0 | 1.3E+003 |           |
| Stage 16 | 1       | Control   | Mean     | 143.4 | 66.8 | 58.2 | 57.2 | 64.4     | 3.0E+003  |
|          |         |           | <i>n</i> | 9     | 9    | 9    | 9    | 9        | 9         |
|          |         |           | s.d.     | 16.4  | 6.8  | 8.8  | 10.7 | 9.3      | 1.1E+003  |
|          |         | FNMO      | Mean     | 178.2 | 78.1 | 64.2 | 62.0 | 88.2     | 4.6E+003  |
|          |         |           | <i>n</i> | 9     | 9    | 9    | 9    | 9        | 9         |
|          |         |           | s.d.     | 28.1  | 12.1 | 12.2 | 10.8 | 28.1     | 1.5E+003  |
|          | 2       | Control   | Mean     | 153.0 | 80.2 | 68.4 | 66.7 | 66.8     | 3.7E+003  |
|          |         |           | <i>n</i> | 9     | 9    | 9    | 9    | 9        | 9         |
|          |         |           | s.d.     | 10.6  | 5.6  | 8.8  | 9.2  | 11.7     | 1.4E+003  |
|          |         | FNMO      | Mean     | 167.2 | 90.9 | 75.1 | 71.2 | 73.3     | 4.9E+003  |
|          |         |           | <i>n</i> | 9     | 9    | 9    | 9    | 9        | 9         |
|          |         |           | s.d.     | 24.5  | 13.8 | 11.4 | 6.9  | 21.9     | 3.2E+003  |
|          | 3       | Control   | Mean     | 152.6 | 74.4 | 59.7 | 53.5 | 75.1     | 5.1E+003  |
|          |         |           | <i>n</i> | 9     | 9    | 9    | 9    | 9        | 9         |
|          |         |           | s.d.     | 16.5  | 12.3 | 10.8 | 14.6 | 11.7     | 2.6E+003  |
|          |         | FNMO      | Mean     | 156.8 | 84.8 | 68.5 | 55.1 | 73.9     | 7.8E+003  |
|          |         |           | <i>n</i> | 9     | 9    | 9    | 9    | 9        | 9         |
|          |         |           | s.d.     | 16.2  | 15.1 | 11.6 | 6.1  | 14.8     | 5.5E+003  |
