# Supplementary material
Source: PubMed Central journal article supplement (PMC2685957)
Supplement: supp_136_4_677__9.pdf [file supp_136_4_677__9.pdf]

Table S9. Data for Fig. 6B

| Run         | Treatment   |          | E0    | E90  | E180 | Einf | Esp      | Viscosity |
|-------------|-------------|----------|-------|------|------|------|----------|-----------|
| 1           | Control     | Mean     | 142.6 | 69.2 | 54.9 | 52.4 | 63.5     | 4.1E+003  |
|             |             | <i>n</i> | 9     | 9    | 9    | 9    | 9        | 9         |
|             |             | s.d.     | 16.3  | 9.5  | 10.2 | 10.3 | 17.0     | 1.6E+003  |
|             | 1.2 uM LatB | Mean     | 44.8  | 16.6 | 13.7 | 14.2 | 19.9     | 6.8E+002  |
|             |             | <i>n</i> | 8     | 8    | 8    | 8    | 8        | 8         |
|             |             | s.d.     | 13.6  | 5.9  | 4.8  | 5.3  | 5.7      | 4.4E+002  |
| 2           | Control     | Mean     | 132.9 | 64.4 | 52.4 | 50.0 | 58.3     | 3.7E+003  |
|             |             | <i>n</i> | 9     | 9    | 9    | 9    | 9        | 9         |
|             |             | s.d.     | 11.1  | 5.9  | 7.2  | 9.3  | 11.6     | 1.4E+003  |
|             | 0.6 uM LatB | Mean     | 75.7  | 27.5 | 23.4 | 23.7 | 34.4     | 1.2E+003  |
|             |             | <i>n</i> | 9     | 9    | 9    | 9    | 9        | 9         |
|             |             | s.d.     | 9.6   | 7.7  | 6.3  | 6.6  | 7.3      | 4.4E+002  |
| 3           | Control     | Mean     | 152.0 | 68.4 | 57.3 | 58.2 | 66.5     | 3.0E+003  |
|             |             | <i>n</i> | 9     | 9    | 9    | 9    | 9        | 9         |
|             |             | s.d.     | 20.9  | 7.8  | 8.5  | 10.3 | 15.1     | 1.2E+003  |
|             | 0.3 uM LatB | Mean     | 120.8 | 45.6 | 37.1 | 36.2 | 60.5     | 2.8E+003  |
|             |             | <i>n</i> | 9     | 9    | 9    | 9    | 9        | 9         |
|             |             | s.d.     | 28.1  | 10.1 | 8.0  | 8.0  | 18.7     | 1.3E+003  |
| 4           | Control     | Mean     | 135.4 | 62.0 | 49.3 | 47.4 | 62.5     | 3.6E+003  |
|             |             | <i>n</i> | 8     | 8    | 8    | 8    | 8        | 8         |
|             |             | s.d.     | 20.0  | 7.9  | 9.4  | 11.3 | 22.5     | 2.2E+003  |
|             | 0.6 uM LatB | Mean     | 85.4  | 29.7 | 24.8 | 24.2 | 44.0     | 1.8E+003  |
|             |             | <i>n</i> | 7     | 7    | 7    | 7    | 7        | 7         |
|             |             | s.d.     | 27.5  | 10.9 | 7.2  | 6.9  | 19.0     | 1.4E+003  |
| 5           | Control     | Mean     | 145.4 | 59.0 | 43.5 | 33.9 | 94.6     | 7.2E+003  |
|             |             | <i>n</i> | 8     | 8    | 8    | 8    | 8        | 8         |
|             |             | s.d.     | 20.2  | 8.3  | 5.8  | 15.6 | 16.7     | 5.7E+003  |
|             | 0.6 uM LatB | Mean     | 97.1  | 28.9 | 18.4 | 17.4 | 54.8     | 3.0E+003  |
|             |             | <i>n</i> | 9     | 9    | 9    | 9    | 9        | 9         |
|             |             | s.d.     | 22.3  | 8.9  | 5.7  | 6.4  | 12.3     | 1.1E+003  |
| 6           | Control     | Mean     | 161.8 | 61.8 | 48.1 | 49.0 | 79.5     | 3.6E+003  |
|             |             | <i>n</i> | 9     | 9    | 9    | 9    | 9        | 9         |
|             |             | s.d.     | 22.7  | 5.3  | 5.7  | 5.9  | 19.7     | 7.3E+002  |
|             | 0.3 uM LatB | Mean     | 125.7 | 40.0 | 29.5 | 29.4 | 68.1     | 3.2E+003  |
|             |             | <i>n</i> | 8     | 8    | 8    | 8    | 8        | 8         |
|             |             | s.d.     | 20.6  | 10.0 | 7.1  | 6.7  | 16.9     | 1.5E+003  |
| 0.6 uM LatB | Mean        | 91.4     | 27.3  | 18.6 | 15.9 | 54.6 | 3.2E+003 |           |
|             | <i>n</i>    | 8        | 8     | 8    | 8    | 8    | 8        |           |
|             | s.d.        | 22.1     | 7.1   | 3.8  | 3.5  | 17.1 | 1.7E+003 |           |
| 7           | Control     | Mean     | 125.6 | 64.0 | 53.6 | 53.7 | 50.8     | 2.7E+003  |
|             |             | <i>n</i> | 9     | 9    | 9    | 9    | 9        | 9         |
|             |             | s.d.     | 15.4  | 7.9  | 9.0  | 10.4 | 9.3      | 9.3E+002  |
|             | 0.3 uM LatB | Mean     | 121.5 | 50.5 | 39.5 | 38.5 | 60.3     | 3.2E+003  |
|             |             | <i>n</i> | 9     | 9    | 9    | 9    | 9        | 9         |
|             |             | s.d.     | 21.1  | 6.9  | 6.0  | 6.1  | 22.3     | 1.4E+003  |
| 0.6 uM LatB | Mean        | 56.6     | 17.8  | 13.7 | 14.3 | 28.4 | 1.0E+003 |           |
|             | <i>n</i>    | 8        | 8     | 8    | 8    | 8    | 8        |           |
|             | s.d.        | 14.8     | 5.6   | 5.3  | 5.1  | 8.4  | 3.5E+002 |           |
