# Supplementary material
Source: PubMed Central journal article supplement (PMC2685957)
Supplement: supp_136_4_677__10.pdf [file supp_136_4_677__10.pdf]

**Table S10. Data for Fig. 6C**

| Run          | Treatment     |          | E0       | E90   | E180 | Einf | Esp  | Viscosity |          |
|--------------|---------------|----------|----------|-------|------|------|------|-----------|----------|
| 1            | Control       | Mean     | 127.0    | 62.2  | 50.9 | 49.0 | 56.9 | 3.4E+003  |          |
|              |               | <i>n</i> | 10       | 10    | 10   | 10   | 10   | 10        |          |
|              |               | s.d.     | 15.5     | 11.2  | 8.0  | 7.0  | 14.0 | 2.2E+003  |          |
|              | 10 uM Y27632  | Mean     | 91.4     | 44.4  | 36.7 | 36.6 | 37.1 | 2.0E+003  |          |
|              |               | <i>n</i> | 8        | 8     | 8    | 8    | 8    | 8         |          |
|              |               | s.d.     | 8.9      | 3.2   | 2.7  | 3.4  | 6.0  | 5.6E+002  |          |
|              | 100 uM Y27632 | Mean     | 61.4     | 27.1  | 25.0 | 26.3 | 26.3 | 4.9E+002  |          |
|              |               | <i>n</i> | 9        | 9     | 9    | 9    | 9    | 9         |          |
|              |               | s.d.     | 6.9      | 2.4   | 2.5  | 2.5  | 5.2  | 1.1E+002  |          |
| 2            | Control       | Mean     | 111.7    | 51.0  | 42.9 | 42.2 | 48.1 | 2.4E+003  |          |
|              |               | <i>n</i> | 8        | 8     | 8    | 8    | 8    | 8         |          |
|              |               | s.d.     | 15.9     | 8.4   | 7.5  | 7.1  | 7.7  | 6.6E+002  |          |
|              | 10 uM Y27632  | Mean     | 86.8     | 37.1  | 30.9 | 32.0 | 35.3 | 1.4E+003  |          |
|              |               | <i>n</i> | 9        | 9     | 9    | 9    | 9    | 9         |          |
|              |               | s.d.     | 5.8      | 3.4   | 3.1  | 3.4  | 3.9  | 3.0E+002  |          |
|              | 100 uM Y27632 | Mean     | 54.2     | 19.9  | 18.2 | 19.5 | 26.8 | 3.3E+002  |          |
|              |               | <i>n</i> | 8        | 8     | 8    | 8    | 8    | 8         |          |
|              |               | s.d.     | 5.2      | 2.1   | 1.9  | 1.9  | 2.1  | 8.1E+001  |          |
| 3            | Control       | Mean     | 110.1    | 48.0  | 37.8 | 36.6 | 54.6 | 3.0E+003  |          |
|              |               | <i>n</i> | 9        | 9     | 9    | 9    | 9    | 9         |          |
|              |               | s.d.     | 11.0     | 5.8   | 4.9  | 5.2  | 9.0  | 7.5E+002  |          |
|              | 10 uM Y27632  | Mean     | 83.1     | 28.6  | 23.6 | 25.4 | 40.8 | 1.2E+003  |          |
|              |               | <i>n</i> | 9        | 9     | 9    | 9    | 9    | 9         |          |
|              |               | s.d.     | 9.3      | 4.0   | 3.7  | 3.6  | 5.7  | 2.1E+002  |          |
|              | 4             | Control  | Mean     | 140.8 | 59.6 | 48.4 | 45.6 | 71.9      | 3.9E+003 |
|              |               |          | <i>n</i> | 9     | 9    | 9    | 9    | 9         | 9        |
|              |               |          | s.d.     | 16.8  | 5.6  | 5.9  | 6.8  | 17.5      | 1.5E+003 |
| 10 uM Y27632 |               | Mean     | 84.5     | 28.4  | 25.1 | 26.8 | 41.4 | 8.6E+002  |          |
|              |               | <i>n</i> | 9        | 9     | 9    | 9    | 9    | 9         |          |
|              |               | s.d.     | 12.3     | 4.8   | 4.6  | 4.5  | 6.4  | 2.7E+002  |          |
| 5            |               | Control  | Mean     | 145.4 | 59.0 | 43.5 | 33.9 | 94.6      | 7.2E+003 |
|              |               |          | <i>n</i> | 8     | 8    | 8    | 8    | 8         | 8        |
|              |               |          | s.d.     | 20.2  | 8.3  | 5.8  | 15.6 | 16.7      | 5.7E+003 |
|              | 40 uM Y27632  | Mean     | 99.9     | 36.3  | 29.2 | 31.5 | 47.4 | 1.5E+003  |          |
|              |               | <i>n</i> | 8        | 8     | 8    | 8    | 8    | 8         |          |
|              |               | s.d.     | 8.8      | 2.6   | 2.4  | 3.0  | 8.7  | 3.7E+002  |          |
|              | 6             | Control  | Mean     | 136.7 | 54.6 | 43.4 | 43.2 | 70.3      | 3.3E+003 |
|              |               |          | <i>n</i> | 9     | 9    | 9    | 9    | 9         | 9        |
|              |               |          | s.d.     | 23.5  | 7.8  | 8.6  | 11.0 | 24.1      | 1.5E+003 |
| 10 uM Y27632 |               | Mean     | 108.2    | 40.2  | 32.7 | 33.5 | 52.8 | 2.1E+003  |          |
|              |               | <i>n</i> | 9        | 9     | 9    | 9    | 9    | 9         |          |
|              |               | s.d.     | 15.8     | 4.8   | 3.5  | 3.8  | 11.0 | 5.3E+002  |          |
| 7            |               | Control  | Mean     | 135.4 | 62.0 | 49.3 | 47.4 | 62.5      | 3.6E+003 |
|              |               |          | <i>n</i> | 8     | 8    | 8    | 8    | 8         | 8        |
|              |               |          | s.d.     | 20.0  | 7.9  | 9.4  | 11.3 | 22.5      | 2.2E+003 |
|              | 40 uM Y27632  | Mean     | 112.4    | 41.0  | 33.3 | 35.5 | 52.3 | 1.8E+003  |          |
|              |               | <i>n</i> | 8        | 8     | 8    | 8    | 8    | 8         |          |
|              |               | s.d.     | 10.9     | 5.3   | 4.9  | 5.1  | 6.0  | 3.2E+002  |          |
