# Supplementary material
Source: PubMed Central journal article supplement (PMC2685957)
Supplement: supp_136_4_677__11.pdf [file supp_136_4_677__11.pdf]

**Table S11. Data for Fig. 6D**

| Run | Treatment        |          | E0    | E90  | E180 | Einf | Esp  | Viscosity |
|-----|------------------|----------|-------|------|------|------|------|-----------|
| 1   | Control          | Mean     | 135.4 | 62.0 | 49.3 | 47.4 | 62.5 | 3.6E+003  |
|     |                  | <i>n</i> | 8     | 8    | 8    | 8    | 8    | 8         |
|     |                  | s.d.     | 20.0  | 7.9  | 9.4  | 11.3 | 22.5 | 2.2E+003  |
|     | 0.6 μM LatB      | Mean     | 85.4  | 29.7 | 24.8 | 24.2 | 44.0 | 1.8E+003  |
|     |                  | <i>n</i> | 7     | 7    | 7    | 7    | 7    | 7         |
|     |                  | s.d.     | 27.5  | 10.9 | 7.2  | 6.9  | 19.0 | 1.4E+003  |
|     | 40 μM Y27326     | Mean     | 112.4 | 41.0 | 33.3 | 35.5 | 52.3 | 1.8E+003  |
|     |                  | <i>n</i> | 8     | 8    | 8    | 8    | 8    | 8         |
|     |                  | s.d.     | 10.9  | 5.3  | 4.9  | 5.1  | 6.0  | 3.2E+002  |
|     | LatB plus Y27326 | Mean     | 79.1  | 25.7 | 20.9 | 22.0 | 38.3 | 1.3E+003  |
|     |                  | <i>n</i> | 8     | 8    | 8    | 8    | 8    | 8         |
|     |                  | s.d.     | 10.9  | 5.0  | 4.0  | 3.8  | 6.4  | 3.5E+002  |
| 2   | Control          | Mean     | 145.4 | 59.0 | 43.5 | 33.9 | 94.6 | 7.2E+003  |
|     |                  | <i>n</i> | 8     | 8    | 8    | 8    | 8    | 8         |
|     |                  | s.d.     | 20.2  | 8.3  | 5.8  | 15.6 | 16.7 | 5.7E+003  |
|     | 0.6 μM LatB      | Mean     | 97.1  | 28.9 | 18.4 | 17.4 | 54.8 | 3.0E+003  |
|     |                  | <i>n</i> | 9     | 9    | 9    | 9    | 9    | 9         |
|     |                  | s.d.     | 22.3  | 8.9  | 5.7  | 6.4  | 12.3 | 1.1E+003  |
|     | 40 μM Y27326     | Mean     | 106.3 | 37.9 | 30.6 | 33.3 | 50.6 | 1.5E+003  |
|     |                  | <i>n</i> | 9     | 9    | 9    | 9    | 9    | 9         |
|     |                  | s.d.     | 20.9  | 5.6  | 4.7  | 6.0  | 12.7 | 3.5E+002  |
|     | LatB plus Y27326 | Mean     | 69.8  | 22.4 | 17.0 | 17.8 | 32.1 | 1.3E+003  |
|     |                  | <i>n</i> | 9     | 9    | 9    | 9    | 9    | 9         |
|     |                  | s.d.     | 12.7  | 5.0  | 5.0  | 5.8  | 6.8  | 6.2E+002  |
| 3   | Control          | Mean     | 158.9 | 69.0 | 59.2 | 60.8 | 68.5 | 2.5E+003  |
|     |                  | <i>n</i> | 9     | 9    | 9    | 9    | 9    | 9         |
|     |                  | s.d.     | 19.7  | 7.6  | 6.3  | 6.7  | 13.5 | 1.0E+003  |
|     | 0.6 μM LatB      | Mean     | 88.7  | 35.9 | 29.4 | 30.0 | 38.6 | 1.7E+003  |
|     |                  | <i>n</i> | 9     | 9    | 9    | 9    | 9    | 9         |
|     |                  | s.d.     | 25.1  | 6.3  | 4.2  | 4.2  | 16.4 | 8.6E+002  |
|     | 40 μM Y27326     | Mean     | 101.8 | 41.3 | 37.9 | 40.3 | 43.8 | 7.5E+002  |
|     |                  | <i>n</i> | 8     | 8    | 8    | 8    | 8    | 8         |
|     |                  | s.d.     | 13.5  | 4.6  | 4.4  | 4.4  | 6.8  | 1.8E+002  |
|     | LatB plus Y27326 | Mean     | 63.8  | 27.5 | 25.6 | 27.0 | 26.0 | 3.6E+002  |
|     |                  | <i>n</i> | 9     | 9    | 9    | 9    | 9    | 9         |
|     |                  | s.d.     | 9.2   | 3.1  | 3.1  | 3.1  | 6.0  | 9.4E+001  |
